# Supplementary material for: Direct ink writing of a graphene/CNT/silicone composite strain sensor with a near-zero temperature coefficient of resistance
Source: Royal Society of Chemistry journal article supplement (doi:10.1039/d2tc00918h), 2022-01-01
Supplement: d2tc00918h1.pdf [file d2tc00918h1.pdf]

## Direct Ink Writing of Graphene/CNT/Silicone Composite Strain Sensor with Near-Zero Temperature Coefficient of Resistance

Wei-Bin Zhu,<sup>a</sup> Shan-Shan Xue,<sup>a</sup> Hao Zhang,<sup>a</sup> You-Yong Wang,<sup>a</sup> Pei Huang,<sup>a,b</sup> Zhen-Hua Tang,<sup>a,\*</sup>  
Yuan-Qing Li,<sup>a,b,\*</sup> Shao-Yun Fu<sup>a,b,\*</sup>

---

- a. College of Aerospace Engineering, Chongqing University, Chongqing 400044, P. R. China.
- b. State Key Laboratory of Power Transmission Equipment and System Security and New Technology, Chongqing University, Chongqing, 400044, China

\* Corresponding author. Email: [zhtang@cqu.edu.cn](mailto:zhtang@cqu.edu.cn), [yqli@cqu.edu.cn](mailto:yqli@cqu.edu.cn), [syfu@cqu.edu.cn](mailto:syfu@cqu.edu.cn)

## 1 Supporting Figures

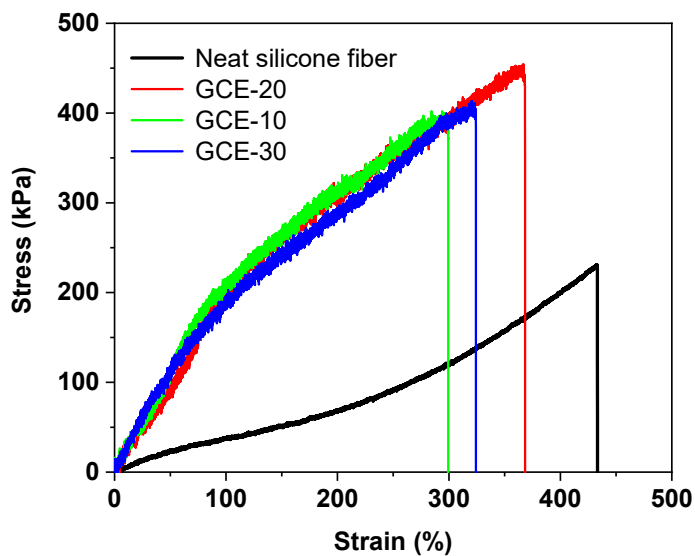

Figure S1. The typical stress-strain curves of the neat silicone fiber and GCE fibers.

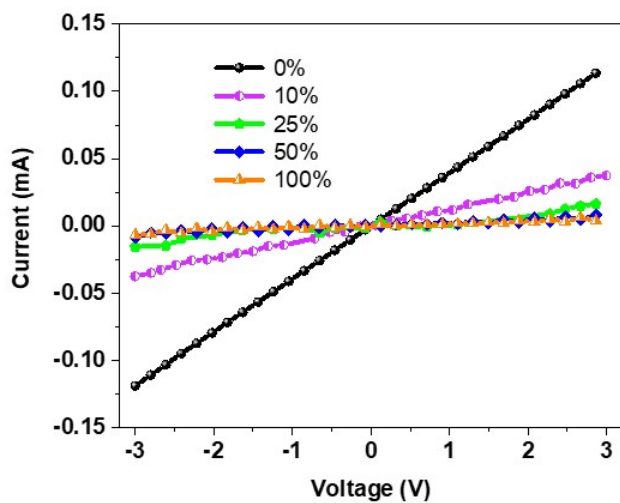

Figure S2. Current-voltage (I-V) curves of the GCE-20 fiber strain sensor at different strains with the voltage ranging from  $-3$  to  $3$  V.

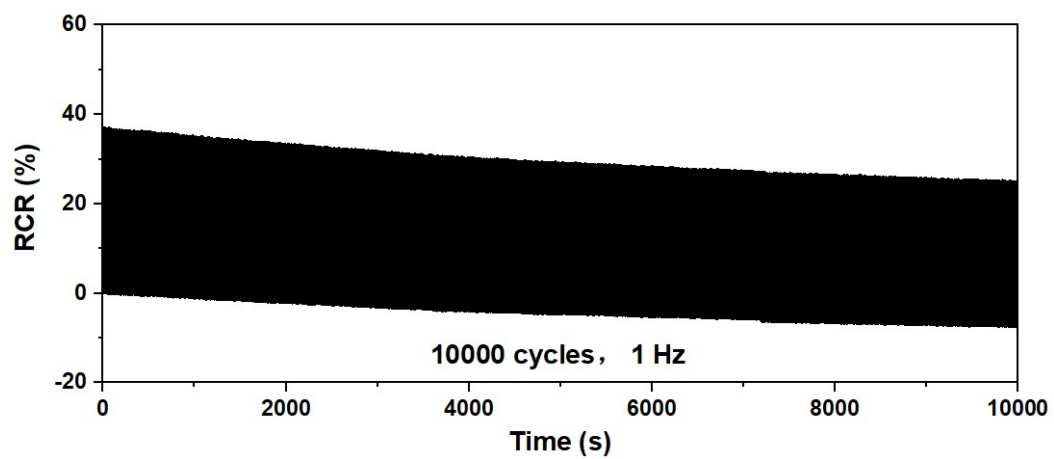

Figure S3. Long-term cyclic stability testing of the GCE fiber strain sensor under stretching-releasing cycles (10000 cycles) with a loading strain of 20%.

## 2 Supporting Tables

**Table S1.** Contents of components of the prepared inks.\*

| Sample  | GNPs content in          |                              |
|---------|--------------------------|------------------------------|
|         | GNPs/CNTs hybrid fillers | Filler contents              |
| GCE-0   | 0 wt%                    | 0 wt% GNP, 2.5 wt% CNT       |
| GCE-10  | 10 wt%                   | 0.25 wt% GNP, 2.25 wt% CNT   |
| GCE-20  | 20 wt%                   | 0.5 wt% GNP, 2 wt% CNT       |
| GCE-25  | 25 wt%                   | 0.625 wt% GNP, 1.875 wt% CNT |
| GCE-30  | 30 wt%                   | 0.75 wt% GNP, 1.75 wt% CNT   |
| GCE-100 | 100 wt%                  | 2.5 wt% GNP, 0 wt% CNT       |

\* Note: the total mass loading of 2.5 wt% is optimized by the experiment with good electrical conductivity for the further application as characteristic content. Specially, the electrical conductivities of 0.5 wt%, 1 wt%, 2 wt%, 2.5 wt%, 3 wt% and 4 wt% GNPs/elastomer composites are about  $8.58 \times 10^{-8}$  S/m,  $1.35 \times 10^{-4}$  S/m, 0.03 S/m, 2.38 S/m, 2.87 S/m and 3.75 S/m, respectively. And the composites with 2.5 wt% filler content have well-balanced performances between sensitivity and work stability.

**Table S2.** Parameters obtained by fitting RCR curves.

| Parameters | $C_1$  | $C_2$   | $C_3$  | $C_4$                   | $C_5$                  | $C_6$                   |
|------------|--------|---------|--------|-------------------------|------------------------|-------------------------|
| GCE        | 0.5135 | -0.2406 | 0.7243 | $-2.384 \times 10^{-3}$ | $2.878 \times 10^{-5}$ | $-9.623 \times 10^{-8}$ |

**Table S3.** Comparison of various stretchable strain sensors.\*

| Strain sensors                        | Tensile strain (%) | GF      | Refs.     |
|---------------------------------------|--------------------|---------|-----------|
| Graphene films                        | 187                | 1500    | 1         |
| CNT/silicone fibers                   | 300                | 1378    | 2         |
|                                       | 600                | 153     |           |
| PANI-based polymer                    | 450                | 4.7     | 3         |
| Carbonized Silk Fabric                | 500                | 37.5    | 4         |
| CNT/PVA hydrogel                      | 1000               | 1.5     | 5         |
| Polyaniline-based hydrogel            | 100                | 2.4     | 6         |
| PPy@TPU pruned fiber                  | 150                | 3       | 7         |
| PVA/graphene/PDMS yarn                | 150                | 1.8     | 8         |
| MXene/CNT                             | 130                | 772     | 9         |
| Gold/PDMS fiber                       | 120                | 33      | 10        |
| Silver nanowire textile               | 100                | 6.3     | 11        |
| Carbonized silk georgette             | 100                | 173     | 12        |
| Graphene/cellulose paper              | 100                | 7       | 13        |
| Graphene-based fiber                  | 100                | 2.5     | 14        |
| Graphene/CNT/PDMS                     | 85                 | 35      | 15        |
| RGO/elastic tape                      | 82                 | 150     | 16        |
| Silver nanowire/PDMS                  | 70                 | 14      | 17        |
| Graphite/printing papers              | 60                 | 536.6   | 18        |
| AgNPs/graphene-microsheets/PU         | 50                 | 500     | 19        |
| CNT/thermal plastic elastomer         | 34.2               | 1135    | 20        |
| Au nanopopcorn/MoS <sub>2</sub> fiber | 30                 | 0.7     | 21        |
| Carbonized cotton thread              | 10                 | 18.5    | 22        |
| silver nanowire/PDMS                  | 9.6                | 926     | 23        |
| Graphene woven fabric/PDMS            | 3                  | 230     | 24        |
| GCE-20 fiber                          | 100                | 14550.2 | This work |

\* Note: CNT represents carbon nanotube; AgNPs is silver nanoparticle; PDMS denotes

polydimethylsiloxane; PANI is polyaniline; PVA is polyvinyl alcohol; PPy is polypyrrole; TPU represents thermoplastic polyurethane; RGO is reduced graphene oxide. MoS<sub>2</sub> is Molybdenum sulfide; PU denotes polyurethane.

## Reference

1. F. Pan, S.-M. Chen, Y. Li, Z. Tao, J. Ye, K. Ni, H. Yu, B. Xiang, Y. Ren, F. Qin, S.-H. Yu and Y. Zhu, *Advanced Functional Materials*, 2018, **28**.
2. Z. Tang, S. Jia, F. Wang, C. Bian, Y. Chen, Y. Wang and B. Li, *ACS Appl Mater Interfaces*, 2018, **10**, 6624-6635.
3. T. Wang, Y. Zhang, Q. Liu, W. Cheng, X. Wang, L. Pan, B. Xu and H. Xu, *Advanced Functional Materials*, 2018, **28**.
4. C. Wang, X. Li, E. Gao, M. Jian, K. Xia, Q. Wang, Z. Xu, T. Ren and Y. Zhang, *Adv Mater*, 2016, DOI: 10.1002/adma.201601572.
5. G. Cai, J. Wang, K. Qian, J. Chen, S. Li and P. S. Lee, *Adv Sci (Weinh)*, 2017, **4**, 1600190.
6. Q. Feng, K. Wan, C. Zhang and T. Liu, *Journal of Polymer Science*, 2021, DOI: 10.1002/pol.20210766.
7. S. Chen, J. Li, H. Liu, W. Shi, Z. Peng and L. Liu, *Chemical Engineering Journal*, 2022, **430**.
8. J. J. Park, W. J. Hyun, S. C. Mun, Y. T. Park and O. O. Park, *ACS Appl Mater Interfaces*, 2015, **7**, 6317-6324.
9. Y. Cai, J. Shen, G. Ge, Y. Zhang, W. Jin, W. Huang, J. Shao, J. Yang and X. Dong, *ACS Nano*, 2018, **12**, 56-62.
10. Z. Liu, D. Qi, G. Hu, H. Wang, Y. Jiang, G. Chen, Y. Luo, X. J. Loh, B. Liedberg and X. Chen, *Adv Mater*, 2018, **30**.
11. S. Chen, S. Liu, P. Wang, H. Liu and L. Liu, *Journal of Materials Science*, 2017, **53**, 2995-3005.
12. C. Wang, K. Xia, M. Jian, H. Wang, M. Zhang and Y. Zhang, *Journal of Materials Chemistry C*, 2017, **5**, 7604-7611.
13. C. Yan, J. Wang, W. Kang, M. Cui, X. Wang, C. Y. Foo, K. J. Chee and P. S. Lee, *Adv Mater*, 2014, **26**, 2022-2027.
14. Y. Cheng, R. Wang, J. Sun and L. Gao, *Adv Mater*, 2015, **27**, 7365-7371.
15. Y. Cai, J. Shen, Z. Dai, X. Zang, Q. Dong, G. Guan, L. J. Li, W. Huang and X. Dong, *Adv Mater*, 2017, **29**.
16. Q. Liu, J. Chen, Y. Li and G. Shi, *ACS Nano*, 2016, **10**, 7901-7906.
17. M. Amjadi, A. Pichitpajongkit, S. Lee, S. Ryu and I. Park, *ACS Nano*, 2014, **8**, 5154-5163.
18. X. Liao, Q. Liao, X. Yan, Q. Liang, H. Si, M. Li, H. Wu, S. Cao and Y. Zhang, *Advanced Functional Materials*, 2015, **25**, 2395-2401.
19. X. Li, H. Hu, T. Hua, B. Xu and S. Jiang, *Nano Research*, 2018, **11**, 5799-5811.
20. L. Li, H. Xiang, Y. Xiong, H. Zhao, Y. Bai, S. Wang, F. Sun, M. Hao, L. Liu, T. Li, Z. Peng, J. Xu and T. Zhang, *Adv Sci (Weinh)*, 2018, **5**, 1800558.
21. L. Lan, F. Zhao, Y. Yao, J. Ping and Y. Ying, *ACS Appl Mater Interfaces*, 2020, **12**, 10689-10696.
22. Y. Q. Li, P. Huang, W. B. Zhu, S. Y. Fu, N. Hu and K. Liao, *Sci Rep*, 2017, **7**, 45013.

23. Y. Heo, Y. Hwang, H. S. Jung, S. H. Choa and H. C. Ko, *Small*, 2017, **13**.
24. X. Liu, C. Tang, X. Du, S. Xiong, S. Xi, Y. Liu, X. Shen, Q. Zheng, Z. Wang, Y. Wu, A. Horner and J.-K. Kim, *Materials Horizons*, 2017, **4**, 477-486.
